# Supplementary material
Source: publisher figshare collection journal article supplement (https://asha.figshare.com/articles/dataset/_/28300049)
Supplement: Supplementary file 1 [file 1]

**Supplemental Material S3.** Characteristics of participants with self-reported ADL or IADL difficulty stratified by hearing loss category, National Health and Aging Trends Study, Round 12.

|                               | Hearing loss categories      |                             |                           |                                 |                |
|-------------------------------|------------------------------|-----------------------------|---------------------------|---------------------------------|----------------|
|                               | Total<br>( <i>N</i> = 2,289) | Normal<br>( <i>n</i> = 657) | Mild<br>( <i>n</i> = 855) | ≥ Moderate<br>( <i>n</i> = 777) | <i>p</i> value |
| Age                           | 79.5 (6.5)                   | 75.1 (4.9)                  | 78.9 (6)                  | 83.9 (7.2)                      | < .001         |
| Male sex                      | 896 (46.7)                   | 194 (40.8)                  | 346 (47.6)                | 356 (57.4)                      | < .001         |
| Race                          |                              |                             |                           |                                 | < .001         |
| White                         | 1,395 (79.7)                 | 345 (77.7)                  | 520 (79.2)                | 530 (84.7)                      |                |
| Black                         | 538 (8.2)                    | 210 (10)                    | 199 (8.2)                 | 129 (4.6)                       |                |
| Hispanic                      | 290 (7.8)                    | 83 (7.5)                    | 114 (8.4)                 | 93 (7.2)                        |                |
| Other                         | 66 (4.3)                     | 19 (4.7)                    | 22 (4.2)                  | 25 (3.5)                        |                |
| Marital status                | 1,000 (61.5)                 | 302 (65.2)                  | 401 (60.3)                | 297 (56.2)                      | < .001         |
| Education                     |                              |                             |                           |                                 | < .001         |
| Less than high school         | 451 (10.6)                   | 100 (7.1)                   | 168 (12.2)                | 183 (15)                        |                |
| High school diploma           | 533 (20.8)                   | 126 (16.7)                  | 200 (22.1)                | 207 (26.8)                      |                |
| Some college                  | 661 (30.4)                   | 210 (32.8)                  | 260 (30.1)                | 191 (25.9)                      |                |
| College or more               | 644 (38.2)                   | 221 (43.4)                  | 227 (35.5)                | 196 (32.3)                      |                |
| Income category               |                              |                             |                           |                                 | .11            |
| Low income                    | 457 (10.3)                   | 132 (8.7)                   | 178 (11.3)                | 147 (11.9)                      |                |
| Middle income                 | 611 (19)                     | 152 (15.3)                  | 235 (20.8)                | 224 (23.4)                      |                |
| High income                   | 1,221 (70.7)                 | 373 (76)                    | 442 (67.9)                | 406 (64.7)                      |                |
| Medicaid enrollment           | 479 (11.3)                   | 134 (9.4)                   | 189 (12.8)                | 156 (12.4)                      | .56            |
| Tricare enrollment            | 139 (5.2)                    | 28 (4.3)                    | 52 (5.5)                  | 59 (6.6)                        | .031           |
| Residential region            |                              |                             |                           |                                 | .10            |
| Northeast region              | 368 (18.4)                   | 104 (19)                    | 124 (16.9)                | 140 (19.8)                      |                |
| Midwest region                | 460 (21.2)                   | 115 (18.5)                  | 185 (23.2)                | 160 (23.2)                      |                |
| South region                  | 976 (38.4)                   | 283 (38.5)                  | 378 (39.3)                | 315 (36.9)                      |                |
| West region                   | 485 (22)                     | 155 (24)                    | 168 (20.6)                | 162 (20.1)                      |                |
| Metropolitan residence        | 1,909 (82.5)                 | 576 (85)                    | 702 (81)                  | 631 (79.8)                      | .002           |
| Number of comorbid conditions |                              |                             |                           |                                 | .022           |
| 0                             | 230 (19.7)                   | 77 (24.7)                   | 73 (17.5)                 | 80 (13.4)                       |                |
| 1                             | 617 (33.3)                   | 189 (34.4)                  | 221 (32.5)                | 207 (32.4)                      |                |
| 2                             | 721 (28)                     | 218 (25.5)                  | 262 (28.6)                | 241 (32.1)                      |                |
| 3 or greater                  | 721 (19)                     | 173 (15.4)                  | 299 (21.4)                | 249 (22.2)                      |                |
| Number of ADL difficulties    |                              |                             |                           |                                 | < .001         |

|                             |              |            |            |            |        |
|-----------------------------|--------------|------------|------------|------------|--------|
| 0                           | 553 (69.5)   | 185 (75.8) | 191 (66.6) | 177 (61.8) |        |
| 1-2 ADLs                    | 1,087 (19.8) | 331 (17.9) | 413 (20.8) | 343 (21.8) |        |
| ≥ 3 ADLs                    | 649 (10.7)   | 141 (6.4)  | 251 (12.6) | 257 (16.4) |        |
| Number of IADL difficulties |              |            |            |            | < .001 |
| 0                           | 552 (69.1)   | 165 (74.3) | 212 (68.4) | 175 (60.2) |        |
| 1-2 ADLs                    | 1,119 (21.3) | 350 (19.4) | 418 (21)   | 351 (25.5) |        |
| ≥ 3 ADLs                    | 618 (9.6)    | 142 (6.3)  | 225 (10.6) | 251 (14.4) |        |
| Number of consequences      |              |            |            |            | .79    |
| 0                           | 1,548 (86)   | 451 (88.4) | 579 (85.7) | 518 (81.6) |        |
| 1-2                         | 576 (10.8)   | 165 (9.6)  | 210 (10.8) | 201 (13.4) |        |
| ≥ 3                         | 165 (3.2)    | 41 (2.1)   | 66 (3.5)   | 58 (5)     |        |
| Treated hearing loss*       | 461 (28)     | —          | 99 (13.1)  | 362 (52.5) | < .001 |

\*among subpopulation of adults with hearing loss > 25 dB

*Note.* ADLs = activities of daily living; IADLs = instrumental activities of daily living.
