# Supplementary material
Source: publisher figshare collection journal article supplement (https://asha.figshare.com/articles/dataset/_/28300049)
Supplement: Supplementary file 2 [file 1]

**Supplemental Material S2.** Associations of hearing loss, ADL/IADL difficulty, and experience of unmet ADL/IADL-related needs excluding participants relying on proxy response, National Health and Aging Trends Study, Round 12.

|                                                                            | Model 1 |              |                | Model 2 |              |                | Model 3 |              |                |
|----------------------------------------------------------------------------|---------|--------------|----------------|---------|--------------|----------------|---------|--------------|----------------|
| ADLs ( <i>n</i> = 4,673)                                                   |         |              |                |         |              |                |         |              |                |
|                                                                            | OR      | 95% CI       | <i>p</i> value | OR      | 95% CI       | <i>p</i> value | OR      | 95% CI       | <i>p</i> value |
| <i>HL category</i>                                                         |         |              |                |         |              |                |         |              |                |
| Normal                                                                     | 1       | ref.         | —              | 1       | ref.         | —              | 1       | ref.         | —              |
| Mild                                                                       | 1.6     | [1.31, 1.97] | < .001         | 1.44    | [1.15, 1.8]  | .002           | 1.38    | [1.09, 1.73] | .01            |
| ≥ Moderate                                                                 | 1.95    | [1.59, 2.4]  | < .001         | 1.6     | [1.22, 2.11] | .001           | 1.54    | [1.15, 2.06] | .004           |
| IADLs ( <i>n</i> = 4,673)                                                  |         |              |                |         |              |                |         |              |                |
| <i>HL category</i>                                                         |         |              |                |         |              |                |         |              |                |
| Normal                                                                     | 1       | ref.         | —              | 1       | ref.         | —              | 1       | ref.         | —              |
| Mild                                                                       | 1.36    | [1.08, 1.71] | .01            | 1.22    | [0.94, 1.57] | .13            | 1.17    | [0.9, 1.51]  | .24            |
| ≥ Moderate                                                                 | 1.88    | [1.51, 2.34] | < .001         | 1.59    | [1.21, 2.09] | .001           | 1.56    | [1.16, 2.09] | .004           |
| Number of consequences of unmet ADL/IADL-related needs ( <i>n</i> = 2,240) |         |              |                |         |              |                |         |              |                |
| <i>HL category</i>                                                         |         |              |                |         |              |                |         |              |                |
| Normal                                                                     | 1       | ref.         | —              | 1       | ref.         | —              | 1       | ref.         | —              |
| Mild                                                                       | 0.96    | [0.7, 1.31]  | .78            | 1.06    | [0.78, 1.43] | .72            | 1.01    | [0.75, 1.36] | .951           |
| ≥ Moderate                                                                 | 1.06    | [0.83, 1.36] | .63            | 1.29    | [0.97, 1.7]  | .08            | 1.29    | [0.96, 1.72] | .086           |

*Note.* ADLs = activities of daily living; IADLs = instrumental activities of daily living; ref. = reference.
