# Supplementary material
Source: publisher figshare collection journal article supplement (https://asha.figshare.com/articles/dataset/_/28300049)
Supplement: Supplementary file 3 [file 1]

**Supplemental Material S1.** Associations between hearing loss, ADL/IADL difficulty, and experience of unmet ADL/IADL-related needs (hearing loss modeled as continuous variable), National Health and Aging Trends Study, Round 12.

|                                                                            | Model 1 |              |                | Model 2 |              |                | Model 3 |              |                |
|----------------------------------------------------------------------------|---------|--------------|----------------|---------|--------------|----------------|---------|--------------|----------------|
| ADLs ( <i>n</i> = 4,724)                                                   |         |              |                |         |              |                |         |              |                |
|                                                                            | RRR     | 95% CI       | <i>p</i> value | RRR     | 95% CI       | <i>p</i> value | RRR     | 95% CI       | <i>p</i> value |
| No difficulty                                                              | 1       | ref.         | —              | 1       | ref.         | —              | 1       | ref.         | —              |
| Moderate difficulty (1-2 ADLs)                                             | 1.17    | [1.09, 1.24] | < .001         | 1.09    | [1, 1.18]    | .04            | 1.08    | [1, 1.18]    | .06            |
| Severe difficulty (≥ 3 ADLs)                                               | 1.43    | [1.32, 1.54] | < .001         | 1.34    | [1.21, 1.47] | < .001         | 1.32    | [1.19, 1.47] | < .001         |
| IADLs ( <i>n</i> = 4,724)                                                  |         |              |                |         |              |                |         |              |                |
| No difficulty                                                              | 1       | ref.         | —              | 1       | ref.         | —              | 1       | ref.         | —              |
| Moderate difficulty (1-2 ADLs)                                             | 1.16    | [1.08, 1.24] | < .001         | 1.09    | [1, 1.19]    | .05            | 1.09    | [0.99, 1.19] | .07            |
| Severe difficulty (≥ 3 ADLS)                                               | 1.38    | [1.28, 1.5]  | < .001         | 1.3     | [1.17, 1.44] | < .001         | 1.28    | [1.14, 1.43] | < .001         |
| Number of consequences of unmet ADL/IADL-related needs ( <i>n</i> = 2,289) |         |              |                |         |              |                |         |              |                |
| No unmet needs                                                             | 1       | ref.         | —              | 1       | ref.         | —              | 1       | ref.         | —              |
| 1-2 unmet needs                                                            | 0.98    | [0.91, 1.07] | .71            | 1       | [0.91, 1.11] | .97            | 1.00    | [0.90, 1.10] | .964           |
| ≥ 3 unmet needs                                                            | 1.14    | [1.02, 1.27] | .02            | 1.26    | [1.11, 1.44] | .001           | 1.28    | [1.12, 1.46] | < .001         |

*Note.* ADLs = activities of daily living; IADLs = instrumental activities of daily living; ref. = reference.
